# Supplementary material for: The Expanded mtDNA Phylogeny of the Franco-Cantabrian Region Upholds the Pre-Neolithic Genetic Substrate of Basques
Source: PLoS One. 2013 Jul 3;8(7):e67835. doi: 10.1371/journal.pone.0067835 (PMC3700859; doi:10.1371/journal.pone.0067835)
Supplement: Table S3 — Absolute (n) and relative (%) frequencies of mtDNA subhaplogroups U5b1f and J1c5c1 in northern Spanish and SW France populations. Classification of haplotypes into haplogroups U5b1f and J1c5c1 was based on HVS-I and HVS-II data as a minimum. EMP accession numbers were retrieved from EMPOP database (version 2.2, release 9). (XLS) [file pone.0067835.s004.xls]

## Sheet: Hoja1
	Table S3. Absolute (n) and relative (%) frequencies of mtDNA subhaplogroups U5b1f and J1c5c1 in northern Spanish and SW France populations. Classification of haplotypes into haplogroups U5b1f and J1c5c1 was based on HVS-I and HVS-II data as a minimum. EMP accesion numbers were retrieved from EMPOP database (version 2.2, release 9).
			U5b1f		J1c5c1
	Population	N	n	%	n	%	Range	Source
	SPAIN
	Guipuzcoa	228	27	11.8	5	2.2	16024-16383/66–370 // 16024-576	Alfonso-Sanchez et al. Am J Hum Biol. 2008, 20(2):154-64; Cardoso et al. Forensic Sci Int Genet. 2012, 6(4):e106-8
	South-West Guipuzcoa	63	6	9.5	0	0	16024-576	Behar et al. Am J Hum Genet 2012, 90(3):486-493
	Biscay	251	9	3.6	2	0.08	16024-16383/66–370 // 16024-576 // 16070-16365/73-408	Alfonso-Sanchez et al. Am J Hum Biol. 2008, 20(2):154-64; Cardoso et al. Forensic Sci Int Genet. 2012, 6(4):e106-8; Prieto et al. Forensic Sci Int Genet. 2011, 5(2):146-51; Behar et al. Am J Hum Genet 2012, 90(3):486-493; Garcia et al. Heredity 2011, 106(1):37-45
	West Biscay	21	0	0	0	0	16024-576	Behar et al. Am J Hum Genet 2012, 90(3):486-493
	Alava	193	1	0.05	2	1.0	16024-576	Cardoso et al. Forensic Sci Int Genet. 2012, 6(4):e106-8; Behar et al. Am J Hum Genet 2012, 90(3):486-493; EMP00556; EMP00557
	North Navarre	210	32	15.2	5	2.4	16019-16392/40–390 // 16024-576	Cardoso et al. Am J Phys Anthropol 2011, 145(3):480-8 and Cardoso et al. GenBank AN. JX294751-JX294850
	Central-West Navarre	64	5	7.8	2	3.1	16024-576	Behar et al. Am J Hum Genet 2012, 90(3):486-493
	North-East Navarre	55	13	23.6	1	1.8	16024-576	" "
	North-West Navarre	53	9	17.0	2	3.8	16024-576	" "
	La Rioja	52	2	3.8	0	0	16024-576	" "
	Burgos	24	1	4.2	0	0	16024-576	" "
	Pas Valley	61	0	0	0	0	16024-576	Cardoso et al. J Forensic Sci. 2010, 55(5):1196-1201
	Cantabria	25	0	0	0	0	16024-576 // 16070-16365/73-408	Behar et al. Am J Hum Genet 2012, 90(3):486-493; Garcia et al. Heredity 2011, 106(1):37-45
	Aragon	37	0	0	0	0	16024-576 // 16070-16365/73-408	" " " "
	Zaragoza	81	2	2.5	1	1.2	15998-16400/30-407	Budowle et al. Forensic Sci Int 1999, 103:23-35
	North-East Spain	141	1	0.7	0	0	16024-16365/70-340 // 16070-16365/73-408	Crespillo et al. Int J Legal Med 2000, 114:130–132; Garcia et al. Heredity 2011, 106(1):37-45
	Madrid	78	0	0	0	0	15998-16400/30-407	Budowle et al. Forensic Sci Int 1999, 103:23-35
	FRANCE
	Lower Navarre (French Basque Country)	73	6	8.2	2	2.7	16024-576	Behar et al. Am J Hum Genet 2012, 90(3):486-493
	Labourdin (French Basque Country)	58	14	24.1	1	1.7	16024-576	" "
	Soule (French Basque Country)	62	11	17.7	3	4.8	16024-576	" "
	Bearn	56	7	12.5	1	1.8	16024-576	" "
	Bigorre	48	4	8.3	0	0	16024-576	" "
	Chalosse	60	9	15.0	2	3.3	16024-576	" "
	Périgord-Limousin	72	0	0	0	0	16055-16410/37-222	Dubut et al. Eur J of Hum Genet 2004, 12:293–300
	Total	2066	159		29
